# Supplementary material
Source: MDPI journal article supplement (https://www.mdpi.com/1999-4907/13/7/966)
Supplement: s1 [file s1]

**Table S1.** The list of 112 species with their families and three types of plant habit

| Species name                      | Family         | Pant habit |
|-----------------------------------|----------------|------------|
| <i>Mangifera indica</i>           | Anacardiaceae  | Tree       |
| <i>Ilex chapaensis</i>            | Aquifoliaceae  | Tree       |
| <i>Schefflera octophylla</i>      | Araliaceae     | Tree       |
| <i>Canarium album</i>             | Burseraceae    | Tree       |
| <i>Canarium tramdenum</i>         | Burseraceae    | Tree       |
| <i>Garcinia oblongifolia</i>      | Clusiaceae     | Tree       |
| <i>Diospyros eriantha</i>         | Ebenaceae      | Tree       |
| <i>Elaeocarpus dubius</i>         | Elaeocarpaceae | Tree       |
| <i>Craibiodendron scleranthum</i> | Ericaceae      | Tree       |
| <i>Bridelia fordii</i>            | Euphorbiaceae  | Tree       |
| <i>Macaranga sampsoni</i>         | Euphorbiaceae  | Tree       |
| <i>Mallotus paniculatus</i>       | Euphorbiaceae  | Tree       |
| <i>Sapium discolor</i>            | Euphorbiaceae  | Tree       |
| <i>Castanopsis chinensis</i>      | Fagaceae       | Tree       |
| <i>Castanopsis fissa</i>          | Fagaceae       | Tree       |
| <i>Engelhardtia roxburghiana</i>  | Juglandaceae   | Tree       |
| <i>Cryptocarya chinensis</i>      | Lauraceae      | Tree       |
| <i>Cryptocarya concinna</i>       | Lauraceae      | Tree       |
| <i>Machilus breviflora</i>        | Lauraceae      | Tree       |
| <i>Machilus chinensis</i>         | Lauraceae      | Tree       |
| <i>Machilus kwangtungensis</i>    | Lauraceae      | Tree       |
| <i>Machilus phoenicis</i>         | Lauraceae      | Tree       |
| <i>Machilus velutina</i>          | Lauraceae      | Tree       |
| <i>Archidendron Incidum</i>       | Mimosaceae     | Tree       |
| <i>Artocarpus styracifolius</i>   | Moraceae       | Tree       |
| <i>Ficus nervosa</i>              | Moraceae       | Tree       |
| <i>Ficus variegata</i>            | Moraceae       | Tree       |
| <i>Myrsine seguinii</i>           | Myrsinaceae    | Tree       |
| <i>Syzygium jambos</i>            | Myrtaceae      | Tree       |
| <i>Syzygium levinei</i>           | Myrtaceae      | Tree       |
| <i>Caryota maxima</i>             | Palmae         | Tree       |
| <i>Microdesmis caseraiaefolia</i> | Pandaceae      | Tree       |
| <i>Ormosia fordiana</i>           | Papilionaceae  | Tree       |
| <i>Ormosia glaberrima</i>         | Papilionaceae  | Tree       |
| <i>Ormosia semicastrata</i>       | Papilionaceae  | Tree       |
| <i>Pinus massoniana</i>           | Pinaceae       | Tree       |
| <i>Xanthophyllum hainanense</i>   | Polygalaceae   | Tree       |
| <i>Carallia brachiata</i>         | Rhizophoraceae | Tree       |
| <i>Pygeum topengii</i>            | Rosaceae       | Tree       |
| <i>Canthium dicoccum</i>          | Rubiaceae      | Tree       |
| <i>Nauclea officinalis</i>        | Rubiaceae      | Tree       |
| <i>Acronychia pedunculata</i>     | Rutaceae       | Tree       |

|                                   |                   |             |
|-----------------------------------|-------------------|-------------|
| <i>Zanthoxylum myriacanthum</i>   | Rutaceae          | Tree        |
| <i>Meliosma rigida</i>            | Sabiaceae         | Tree        |
| <i>Casearia velutina</i>          | Samydaceae        | Tree        |
| <i>Nephelium chryseum</i>         | Sapindaceae       | Tree        |
| <i>Chrysophyllum lanceolatum</i>  | Sapotaceae        | Tree        |
| <i>Sarcosperma laurinum</i>       | Sarcospermataceae | Tree        |
| <i>Pterospermum heterophyllum</i> | Sterculiaceae     | Tree        |
| <i>Pterospermum lanceaefolium</i> | Sterculiaceae     | Tree        |
| <i>Sterculia lanceolata</i>       | Sterculiaceae     | Tree        |
| <i>Schima superba</i>             | Theaceae          | Tree        |
| <i>Gironniera subaequalis</i>     | Ulmaceae          | Tree        |
| <i>Vitex quinata</i>              | Verbenaceae       | Tree        |
| <i>Toxicodendron succedaneum</i>  | Anacardiaceae     | Small arbor |
| <i>Ilex cochinchinensis</i>       | Aquifoliaceae     | Small arbor |
| <i>Ilex triflora</i>              | Aquifoliaceae     | Small arbor |
| <i>Aralia spinifolia</i>          | Araliaceae        | Small arbor |
| <i>Diospyros morrisiana</i>       | Ebenaceae         | Small arbor |
| <i>Aporosa yunnanensis</i>        | Euphorbiaceae     | Small arbor |
| <i>Bridelia tomentosa</i>         | Euphorbiaceae     | Small arbor |
| <i>Glochidion wrightii</i>        | Euphorbiaceae     | Small arbor |
| <i>Lindera chunii</i>             | Lauraceae         | Small arbor |
| <i>Litsea cubeba</i>              | Lauraceae         | Small arbor |
| <i>Memecylon ligustrifolium</i>   | Melastomataceae   | Small arbor |
| <i>Archidendron clypearia</i>     | Mimosaceae        | Small arbor |
| <i>Cylindrokelupha turgida</i>    | Mimosaceae        | Small arbor |
| <i>Ficus fistulosa</i>            | Moraceae          | Small arbor |
| <i>Ficus esquiroliana</i>         | Moraceae          | Small arbor |
| <i>Acmena acuminatissima</i>      | Myrtaceae         | Small arbor |
| <i>Syzygium champioii</i>         | Myrtaceae         | Small arbor |
| <i>Syzygium rehderianum</i>       | Myrtaceae         | Small arbor |
| <i>Helicia reticulata</i>         | Proteaceae        | Small arbor |
| <i>Photinia prunifolia</i>        | Rosaceae          | Small arbor |
| <i>Diplospora dubia</i>           | Rubiaceae         | Small arbor |
| <i>Melicope pteleifolia</i>       | Rutaceae          | Small arbor |
| <i>Homalium cochinchinense</i>    | Samydaceae        | Small arbor |
| <i>Mischocarpus pentapetalus</i>  | Sapindaceae       | Small arbor |
| <i>Symplocos lancifolia</i>       | Symplocaceae      | Small arbor |
| <i>Eurya macartneyi</i>           | Theaceae          | Small arbor |
| <i>Trema tomentosa</i>            | Ulmaceae          | Small arbor |
| <i>Euonymus laxiflorus</i>        | Celastraceae      | Shrub       |
| <i>Enkianthus quinqueflorus</i>   | Ericaceae         | Shrub       |
| <i>Alchornea trewioides</i>       | Euphorbiaceae     | Shrub       |
| <i>Antidesma japonicum</i>        | Euphorbiaceae     | Shrub       |
| <i>Croton lachnocarpus</i>        | Euphorbiaceae     | Shrub       |

|                                |                 |       |
|--------------------------------|-----------------|-------|
| <i>Glochidion eriocarpum</i>   | Euphorbiaceae   | Shrub |
| <i>Blastus cochinchinensis</i> | Melastomataceae | Shrub |
| <i>Melastoma sanguineum</i>    | Melastomataceae | Shrub |
| <i>Ficus variolosa</i>         | Moraceae        | Shrub |
| <i>Ardisia quinqueгона</i>     | Myrsinaceae     | Shrub |
| <i>Aidia canthioides</i>       | Rubiaceae       | Shrub |
| <i>Canthium horridum</i>       | Rubiaceae       | Shrub |
| <i>Gardenia jasminoides</i>    | Rubiaceae       | Shrub |
| <i>Ixora chinensis</i>         | Rubiaceae       | Shrub |
| <i>Lasianthus chinensis</i>    | Rubiaceae       | Shrub |
| <i>Psychotria asistica</i>     | Rubiaceae       | Shrub |
| <i>Tarenna mollissima</i>      | Rubiaceae       | Shrub |
| <i>Wikstroemia nutans</i>      | Thymelaeaceae   | Shrub |
| <i>Clerodendrum fortunatum</i> | Verbenaceae     | Shrub |

---
